# Supplementary material for: Virulence Structure and Genetic Diversity of Blumeria graminis f. sp. avenae from Different Regions of Europe
Source: MDPI journal article supplement (doi:10.3390/plants11101358), 2022-05-20
Supplement: s1 [file s1]

Supplementary material Table S1. Pathotypes identified among analysed *B. graminis* f.sp. *avenae* isolates.

|    | pathotype | frequency | populations |    |    |    |    |
|----|-----------|-----------|-------------|----|----|----|----|
|    |           |           | CZ          | FI | IE | DE | PL |
| 1  | DBMB      | 0,025     | 2           |    |    |    |    |
| 2  | FBBB      | 0,0125    |             |    |    |    | 1  |
| 3  | HBDB      | 0,0125    |             |    |    |    | 1  |
| 4  | JBMB      | 0,0625    | 5           |    |    |    |    |
| 5  | KBBB      | 0,0125    |             |    |    |    | 1  |
| 6  | LBFB      | 0,0625    |             |    | 5  |    |    |
| 7  | NBBQ      | 0,025     |             |    |    |    | 2  |
| 8  | NBCG      | 0,0125    |             |    |    |    | 1  |
| 9  | NBCL      | 0,0125    |             |    |    |    | 1  |
| 10 | NBDL      | 0,0125    |             |    |    |    | 1  |
| 11 | NBFB      | 0,0125    |             |    | 1  |    |    |
| 12 | NBKB      | 0,05      |             |    | 4  |    |    |
| 13 | NBMB      | 0,05      | 3           |    |    |    | 1  |
| 14 | NBRB      | 0,0125    |             |    |    |    | 1  |
| 15 | NBTB      | 0,0625    |             | 5  |    |    |    |
| 16 | PBTB      | 0,0125    |             | 1  |    |    |    |
| 17 | RBBB      | 0,025     |             |    |    |    | 2  |
| 18 | RBDB      | 0,025     |             |    |    |    | 2  |
| 19 | RBFB      | 0,0125    |             |    |    |    | 1  |
| 20 | RBTB      | 0,0125    |             |    |    |    | 1  |
| 21 | TBBB      | 0,075     |             |    |    | 2  | 4  |
| 22 | TBBL      | 0,0375    |             |    |    |    | 3  |
| 23 | TBCB      | 0,025     |             |    |    |    | 2  |
| 24 | TBCG      | 0,0125    |             |    |    |    | 1  |
| 25 | TBHB      | 0,025     |             |    |    | 2  |    |
| 26 | TBKB      | 0,025     |             |    |    |    | 2  |
| 27 | TBKL      | 0,0125    |             |    |    |    | 1  |
| 28 | TBLL      | 0,0125    |             |    |    |    | 1  |
| 29 | TBMB      | 0,05      |             |    |    |    | 4  |
| 30 | TBPB      | 0,025     |             |    |    | 1  | 1  |
| 31 | TBTB      | 0,0625    |             | 4  |    |    | 1  |
| 32 | TCBB      | 0,0125    |             |    |    |    | 1  |
| 33 | TCCB      | 0,0125    |             |    |    |    | 1  |
| 34 | TCLL      | 0,0125    |             |    |    |    | 1  |
| 35 | TDBB      | 0,05      |             |    |    | 4  |    |
| 36 | TDPB      | 0,0125    |             |    |    | 1  |    |
| 37 | TDRB      | 0,0125    |             |    |    |    | 1  |
